# Supplementary material for: Finding New Genes for Non-Syndromic Hearing Loss through an In Silico Prioritization Study
Source: PubMed Central journal article supplement (PMC2946934; doi:10.1371/journal.pone.0012742), 2010-09-28
Supplement: pone.0012742.s001.pdf [file pone.0012742.s001.pdf]

Table S1. NSHL autosomal dominant loci

| LocusName | Position        | References |
|-----------|-----------------|------------|
| DFNA1     | 5q31            | [1], [2]   |
| DFNA2     | 1p34            | [3,4]      |
| DFNA3A    | 13q11           | [5,6]      |
| DFNA3B    | 13q12           | [7]        |
| DFNA4     | 19q13           | [8,9]      |
| DFNA5     | 7p15            | [10,11]    |
| DFNA6     | 4p16            | [12-14]    |
| DFNA7     | 1q21-q23        | [15]       |
| DFNA8     | 11q22-24        | [16,17]    |
| DFNA9     | 14q12-q13       | [18,19]    |
| DFNA10    | 6q22-q23        | [20-22]    |
| DFNA11    | 11q13.5         | [23-25]    |
| DFNA12    | 11q22-q24       | [16,17]    |
| DFNA13    | 6p21            | [26,27]    |
| DFNA14    | 4p16            | [12-14]    |
| DFNA15    | 5q31            | [28]       |
| DFNA16    | 2q23-q24.3      | [29]       |
| DFNA17    | 22q12.2-q13.3   | [30]       |
| DFNA18    | 3q22            | [31]       |
| DFNA19    | 10 (pericentr.) | [32]       |
| DFNA20    | 17q25           | [33-35]    |
| DFNA21    | 6p21            | [36]       |
| DFNA22    | 6q13            | [37]       |
| DFNA23    | 14q23           | [38]       |
| DFNA24    | 4q35-qter       | [39]       |
| DFNA25    | 12q22-q24       | [40]       |
| DFNA26    | 17q25           | [34,35]    |
| DFNA27    | 4q12-q13.1      | [41]       |
| DFNA28    | 8q22            | [42]       |
| DFNA30    | 15q25-26        | [43]       |
| DFNA31    | 6p21.3          | [44]       |
| DFNA32    | 11p15           | [45]       |
| DFNA34    | 1q44            | [46]       |
| DFNA36    | 9q13-q21        | [47]       |
| DFNA37    | 1p21            | [48]       |
| DFNA38    | 4p16            | [12-14]    |
| DFNA39    | 4q21-q22        | [49]       |
| DFNA40    | 16p13.11-p12.2  | [50]       |
| DFNA41    | 12q24-qter      | [50]       |
| DFNA42    | 5q31.1-q32      | [51]       |
| DFNA43    | 2p12            | [52]       |
| DFNA44    | 3q28            | [53]       |
| DFNA47    | 9p21-22         | [54]       |
| DFNA48    | 12q13-q14       | [55]       |
| DFNA49    | 1q21-q23        | [56]       |
| DFNA50    | 7q32            | [57]       |
| DFNA51    | 9q21            | [58]       |
| DFNA52    | 4q28            | [51]       |
| DFNA53    | 14q11-q12       | [59]       |
| DFNA54    | 5q31            | [60]       |
| DFNA57    | 19p13.2         | [61]       |
| DFNA59    | 11p14.2-q12.3   | [62]       |

## References

1. Leon P, Raventos H, Lynch E, Morrow J, King M (1992) The gene for an inherited form of deafness maps to chromosome 5q31. *Proc Natl Acad Sci U S A* 89: 5181-5184.
2. Lynch E, Lee M, Morrow J, Welsh P, Len P, et al. (1997) Nonsyndromic deafness DFNA1 associated with mutation of a human homolog of the *Drosophila* gene *diaphanous*. *Science* 278: 1315-1318.
3. Coucke P, Van Camp G, Djoyodiharjo B, Smith S, Frants R, et al. (1994) Linkage of autosomal dominant hearing loss to the short arm of chromosome 1 in two families. *N Engl J Med* 331: 425-431.
4. Kubisch C, Schroeder B, Friedrich T, Ltjohann B, El-Amraoui A, et al. (1999) *KCNQ4*, a novel potassium channel expressed in sensory outer hair cells, is mutated in dominant deafness. *Cell* 96: 437-446.
5. Chaïb H, Lina-Granade G, Guilford P, Plauchu H, Levilliers J, et al. (1994) A gene responsible for a dominant form of neurosensory non-syndromic deafness maps to the *NSRD1* recessive deafness gene interval. *Hum Mol Genet* 3: 2219-2222.
6. Denoyelle F, Lina-Granade G, Plauchu H, Bruzzone R, Chab H, et al. (1998) *Connexin 26* gene linked to a dominant deafness. *Nature* 393: 319-320.
7. Grifa A, Wagner C, D'Ambrosio L, Melchionda S, Bernardi F, et al. (1999) Mutations in *GJB6* cause nonsyndromic autosomal dominant deafness at *DFNA3* locus. *Nat Genet* 23: 16-18.
8. Chen A, Ni L, Fukushima K, Marietta J, O'Neill M, et al. (1995) Linkage of a gene for dominant non-syndromic deafness to chromosome 19. *Hum Mol Genet* 4: 1073-1076.
9. Donaudy F, Snoeckx R, Pfister M, Zenner H, Blin N, et al. (2004) Nonmuscle myosin heavy-chain gene *MYH14* is expressed in cochlea and mutated in patients affected by autosomal dominant hearing impairment (*DFNA4*). *Am J Hum Genet* 74: 770-776.
10. van Camp G, Coucke P, Balemans W, van Velzen D, van de Bilt C, et al. (1995) Localization of a gene for non-syndromic hearing loss (*DFNA5*) to chromosome 7p15. *Hum Mol Genet* 4: 2159-2163.
11. Van Laer L, Huizing E, Verstreken M, van Zuijlen D, Wauters J, et al. (1998) Nonsyndromic hearing impairment is associated with a mutation in *DFNA5*. *Nat Genet* 20: 194-197.
12. Lesperance M, Hall Jr, Bess F, Fukushima K, Jain P, et al. (1995) A gene for autosomal dominant nonsyndromic hereditary hearing impairment maps to 4p16.3. *Hum Mol Genet* 4: 1967-1972.
13. Bernalova I, Van Camp G, Bom S, Brown D, Cryns K, et al. (2001) Mutations in the *Wolfram syndrome 1* gene (*WFS1*) are a common cause of low frequency sensorineural hearing loss. *Hum Mol Genet* 10: 2501-2508.
14. Young T, Ives E, Lynch E, Person R, Snook S, et al. (2001) Non-syndromic progressive hearing loss *DFNA38* is caused by heterozygous missense mutation in the *Wolfram syndrome 1* gene *WFS1*. *Hum Mol Genet* 10: 2509-2514.
15. Fagerheim T, Nilssen O, Raeymaekers P, Brox V, Moum T, et al. (1996) Identification of a new locus for autosomal dominant non-syndromic hearing impairment (*DFNA7*) in a large Norwegian family. *Hum Mol Genet* 5: 1187-1191.

16. Verhoeven K, Van Camp G, Govaerts P, Balemans W, Schatteman I, et al. (1997) A gene for autosomal dominant nonsyndromic hearing loss (DFNA12) maps to chromosome 11q22-24. *Am J Hum Genet* 60: 1168-1173.
17. Verhoeven K, Van Laer L, Kirschhofer K, Legan P, Hughes D, et al. (1998) Mutations in the human alpha-tectorin gene cause autosomal dominant non-syndromic hearing impairment. *Nat Genet* 19: 60-62.
18. Manolis E, Yandavi N, Nadol JJ, Eavey R, McKenna M, et al. (1996) A gene for non-syndromic autosomal dominant progressive postlingual sensorineural hearing loss maps to chromosome 14q12-13. *Hum Mol Genet* 5: 1047-1050.
19. Robertson N, Lu L, Heller S, Merchant S, Eavey R, et al. (1998) Mutations in a novel cochlear gene cause DFNA9, a human nonsyndromic deafness with vestibular dysfunction. *Nat Genet* 20: 299-303.
20. O'Neill M, Marietta J, Nishimura D, Wayne S, G VC, et al. (1996) A gene for autosomal dominant late-onset progressive non-syndromic hearing loss, DFNA10, maps to chromosome 6. *Hum Mol Genet* 5: 853-856.
21. Wayne S, Robertson N, DeClau F, Chen N, Verhoeven K, et al. (2001) Mutations in the transcriptional activator EYA4 cause late-onset deafness at the DFNA10 locus. *Hum Mol Genet* 10: 195-200.
22. Verhoeven K, Fagerheim T, Prasad S, Wayne S, De Clau F, et al. (2000) Refined localization and two additional linked families for the DFNA10 locus for nonsyndromic hearing impairment. *Hum Genet* 107: 7-11.
23. Guilford P, Ayadi H, Blanchard S, Chaib H, Le Paslier D, et al. (1994) A human gene responsible for neurosensory, non-syndromic recessive deafness is a candidate homologue of the mouse sh-1 gene. *Hum Mol Genet* 3: 989-993.
24. Liu X, Walsh J, Mburu P, Kendrick-Jones J, Cope M, et al. (1997) Mutations in the myosin VIIA gene cause non-syndromic recessive deafness. *Nat Genet* 16: 188-190.
25. Weil D, Kssel P, Blanchard S, Lvy G, Levi-Acobas F, et al. (1997) The autosomal recessive isolated deafness, DFNB2, and the Usher 1B syndrome are allelic defects of the myosin-VIIA gene. *Nat Genet* 16: 191-193.
26. Brown M, Tomek M, Van Laer L, Smith S, Kenyon J, et al. (1997) A novel locus for autosomal dominant nonsyndromic hearing loss, DFNA13, maps to chromosome 6p. *Am J Hum Genet* 61: 924-927.
27. McGuirt W, Prasad S, Griffith A, Kunst H, Green G, et al. (1999) Mutations in COL11A2 cause non-syndromic hearing loss (DFNA13). *Nat Genet* 23: 413-419.
28. Vahava O, Morell R, Lynch E, Weiss S, Kagan M, et al. (1998) Mutation in transcription factor POU4F3 associated with inherited progressive hearing loss in humans. *Science* 279: 1950-1954.
29. Fukushima K, Kasai N, Ueki Y, Nishizaki K, Sugata K, et al. (1999) A gene for fluctuating, progressive autosomal dominant nonsyndromic hearing loss, DFNA16, maps to chromosome 2q23-24.3. *Am J Hum Genet* 65: 141-150.

30. Lalwani A, Luxford W, Mhatre A, Attaie A, Wilcox E, et al. (1999) A new locus for nonsyndromic hereditary hearing impairment, DFNA17, maps to chromosome 22 and represents a gene for cochleosaccular degeneration. *Am J Hum Genet* 64: 318-323.
31. Bonsch D, Scheer P, Neumann C, Lang-Roth R, Seifert E, et al. (2001) A novel locus for autosomal dominant, non-syndromic hearing impairment (DFNA18) maps to chromosome 3q22 immediately adjacent to the DM2 locus. *Europ J Hum Genet* 9: 165-170.
32. Green, et al (1998) Abstract 107. In: *The Molecular Biology of Hearing and Deafness Meeting*. Bethesda, Maryland.
33. Morell R, Friderici K, Wei S, Elfenbein J, Friedman T, et al. (2000) A new locus for late-onset, progressive, hereditary hearing loss DFNA20 maps to 17q25. *Genomics* 63: 1-6.
34. Zhu M, Yang T, Wei S, DeWan A, Morell R, et al. (2003) Mutations in the gamma-actin gene (ACTG1) are associated with dominant progressive deafness (DFNA20/26). *Am J Hum Genet* 73: 1082-1091.
35. van Wijk E, Krieger E, Kemperman M, De Leenheer E, Huygen P, et al. (2003) A mutation in the gamma actin 1 (ACTG1) gene causes autosomal dominant hearing loss (DFNA20/26). *J Med Genet* 40: 879-884.
36. Kunst H, Marres H, Huygen P, Van Duijnhoven G, Krebsova A, et al. (2009) Non-syndromic autosomal dominant progressive non-specific mid-frequency sensorineural hearing impairment with childhood to late adolescence onset (DFNA21). *Clin Otolaryng* 25: 45-54.
37. Melchionda S, Ahituv N, Bisceglia L, Sobe T, Glaser F, et al. (2001) MYO6, the human homologue of the gene responsible for deafness in Snell's waltzer mice, is mutated in autosomal dominant nonsyndromic hearing loss. *Am J Hum Genet* 69: 635-640.
38. Ruf R, Xu P, Silvius D, Otto E, Beekmann F, et al. (2004) SIX1 mutations cause branchio-otorenal syndrome by disruption of EYA1-SIX1-DNA complexes. *Proc Natl Acad Sci U S A* 101: 8090-8095.
39. Häfner F, Salam A, Linder T, Balmer D, Baumer A, et al. (2000) A novel locus (DFNA24) for prelingual nonprogressive autosomal dominant nonsyndromic hearing loss maps to 4q35-qter in a large Swiss German kindred. *Am J Hum Genet* 66: 1437-1442.
40. Petek E, Windpassinger C, Mach M, Rauter L, Scherer S, et al. (2003) Molecular characterization of a 12q22-q24 deletion associated with congenital deafness: confirmation and refinement of the DFNA25 locus. *Am J Med Genet A* 117: 122-126.
41. Peters L, Fridell R, Boger E, San Agustin T, Madeo A, et al. (2008) A locus for autosomal dominant progressive non-syndromic hearing loss, DFNA27, is on chromosome 4q12-13.1. *Clin Genet* 73: 367-372.
42. Peters L, Anderson D, Griffith A, Grundfast K, San Agustin T, et al. (2002) Mutation of a transcription factor, TFCP2L3, causes progressive autosomal dominant hearing loss, DFNA28. *Hum Mol Genet* 11: 2877-2885.
43. Mangino M, Flex E, Capon F, Sangiuolo F, Carraro E, et al. (2001) Mapping of a new autosomal dominant nonsyndromic hearing loss locus (DFNA30) to chromosome 15q25-26. *Eur J Hum Genet* 9: 667-671.

44. Snoeckx R, Kremer H, Ensink R, Flothmann K, de Brouwer A, et al. (2004) A novel locus for autosomal dominant non-syndromic hearing loss, DFNA31, maps to chromosome 6p21.3. *J Med Genet* 41: 11-13.
45. Li X, Saal H, Friedman T, Friedman R (2000) A new gene for autosomal dominant nonsyndromic sensorineural hearing loss (DFNA32) maps to 11p15. *ASHG Annual Meeting Abstract*: 1727.
46. Kurima K, Szymko Y, Rudy S, Morell RJ, Friedman TB, et al. (2000) Genetic map localization of DFNA34 and DFNA26, two autosomal dominant non-syndromic deafness loci. *ASHG Annual Meeting Abstract*: 1654.
47. Kurima K, Peters L, Yang Y, Riazuddin S, Ahmed Z, et al. (2002) Dominant and recessive deafness caused by mutations of a novel gene, TMC1, required for cochlear hair-cell function. *Nat Genet* 30: 277-284.
48. Talebizadeh Z, Kenyon J, Askew J, Smith S (2000) A new locus for dominant progressive hearing loss DFN37 mapped to chromosome 1p21. *ASHG Annual Meeting Abstract*: 1740.
49. Xiao S, Yu C, Chou X, Yuan W, Wang Y, et al. (2001) Dentinogenesis imperfecta 1 with or without progressive hearing loss is associated with distinct mutations in DSPP. *Nature Genet* 27: 201-204.
50. Chen H, Phillips H, Callen D, Kim R, Wistow G, et al. (1992) Localization of the human gene for mu-crystallin to chromosome 16p. *Genomics* 14: 1115-1116.
51. Xia J, Deng H, Feng Y, Zhang H, Pan Q, et al. (2002) A novel locus for autosomal dominant nonsyndromic hearing loss identified at 5q31.1-32 in a Chinese pedigree. *J Hum Genet* 47: 635-640.
52. Flex E, Mangino M, Mazzoli M, Martini A, Migliosi V, et al. (2003) Mapping of a new autosomal dominant non-syndromic hearing loss locus (DFNA43) to chromosome 2p12. *J Med Genet* 40: 278-281.
53. Modamio-Høybjør S, Moreno-Pelayo M, Menca A, del Castillo I, Chardenoux S, et al. (2003) A novel locus for autosomal dominant nonsyndromic hearing loss (DFNA44) maps to chromosome 3q28-29. *Hum Genet* 112: 24-28.
54. D'Adamo P, Donaudy F, D'Eustacchio A, Di Iorio E, Melchionda S, et al. (2003) A new locus (DFNA47) for autosomal dominant non-syndromic inherited hearing loss maps to 9p21-22 in a large Italian family. *Eur J Hum Genet* 11: 121-124.
55. D'Adamo P, Pinna M, Capobianco S, Cesarani A, D'Eustacchio A, et al. (2003) A novel autosomal dominant non-syndromic deafness locus (DFNA48) maps to 12q13-q14 in a large Italian family. *Hum Genet* 112: 319-320.
56. Moreno-Pelayo M, Modamio-Høybjør S, Menca A, del Castillo I, Chardenoux S, et al. (2003) DFNA49, a novel locus for autosomal dominant non-syndromic hearing loss, maps proximal to DFNA7/DFNM1 region on chromosome 1q21-q23. *J Med Genet* 40: 832-836.
57. Modamio-Høybjør S, Moreno-Pelayo M, Menca A, del Castillo I, Chardenoux S, et al. (2004) A novel locus for autosomal dominant nonsyndromic hearing loss, DFNA50, maps to chromosome 7q32 between the DFNB17 and DFNB13 deafness loci. *J Med Genet* 41: e14.
58. Hereditary Hearing Loss Homepage. URL <http://webh01.ua.ac.be/hhh/>.

59. Yan D, Ke X, Blanton S, Ouyang X, Pandya A, et al. (2006) A novel locus for autosomal dominant non-syndromic deafness, DFNA53, maps to chromosome 14q11.2-q12. *J Med Genet* 43: 170-174.
60. Gürtler N, Kim Y, Mhatre A, Schlegel C, Mathis A, et al. (2004) DFNA54, a third locus for low-frequency hearing loss. *J Mol Med* 82: 775-780.
61. Bönsch D, Schmidt C, Scheer P, Bohlender J, Neumann C, et al. (2008) A new locus for an autosomal dominant, non-syndromic hearing impairment (DFNA57) located on chromosome 19p13.2 and overlapping with DFNB15. *HNO* 56: 177-182.
62. Chatterjee A, Jalvi R, Pandey N, Rangasayee R, Anand A (2009) A novel locus DFNA59 for autosomal dominant nonsyndromic hearing loss maps at chromosome 11p14.2-q12.3. *Hum Genet* 124: 669-675.
