# Supplementary material for: Finding New Genes for Non-Syndromic Hearing Loss through an In Silico Prioritization Study
Source: PubMed Central journal article supplement (PMC2946934; doi:10.1371/journal.pone.0012742), 2010-09-28
Supplement: pone.0012742.s002.pdf [file pone.0012742.s002.pdf]

Table S2. NSHL autosomal recessive loci

| LocusName | Position        | References |
|-----------|-----------------|------------|
| DFNB1     | 13q11-q12       | [1-3]      |
| DFNB2     | 11q13.5         | [4-6]      |
| DFNB3     | 17p11.2         | [7]        |
| DFNB4     | 7q31            | [8]        |
| DFNB5     | 14q12           | [9, 10]    |
| DFNB6     | 3p21            | [11]       |
| DFNB7     | 9q13-q21        | [12]       |
| DFNB8     | 21q22           | [13]       |
| DFNB9     | 2p22-p23        | [14]       |
| DFNB10    | 21q22.3         | [15, 16]   |
| DFNB11    | 9q13-q21        | [17]       |
| DFNB12    | 10q21-q22       | [14]       |
| DFNB13    | 7q34-36         | [18]       |
| DFNB14    | 7q31            | [19]       |
| DFNB15    | 3q21-q25; 19p13 | [20]       |
| DFNB16    | 15q15           | [21, 22]   |
| DFNB17    | 7q31            | [23]       |
| DFNB18    | 11p14-15.1      | [24]       |
| DFNB19    | 18p11           | [25]       |
| DFNB20    | 11q25-qter      | [26]       |
| DFNB21    | 11q22-q24       | [27]       |
| DFNB22    | 16p12.2         | [28]       |
| DFNB23    | 10q21           | [29]       |
| DFNB24    | 11q23           | [30]       |
| DFNB25    | 4p15.3-q12      | [31]       |
| DFNB26    | 4q31            | [32]       |
| DFNB27    | 2q23-q31        | [33]       |
| DFNB28    | 22q13           | [34]       |
| DFNB29    | 21q22           | [35]       |
| DFNB30    | 10p11.1         | [36]       |
| DFNB31    | q32-q34         | [37]       |
| DFNB32    | 1p13.3-p22.1    | [38]       |
| DFNB33    | 10p11.23-q21.1  | [39]       |
| DFNB35    | 14q24.1-q24.3   | [40]       |
| DFNB36    | 1p36.3-p36.1    | [41]       |
| DFNB37    | 6q13            | [42]       |
| DFNB38    | 6q26-q27        | [43]       |
| DFNB39    | 7q11.22-q21.12  | [44]       |
| DFNB40    | 22q11.21-q12.1  | [45]       |
| DFNB42    | 3q13.31-q22.3   | [46]       |
| DFNB44    | 7p14.1-q11.22   | [47]       |
| DFNB45    | 1q43-q44        | [48]       |
| DFNB46    | 18p11.32-p11.31 | [49]       |
| DFNB47    | 2p25.1-p24.3    | [50]       |
| DFNB48    | 15q23-q25.1     | [51]       |
| DFNB49    | 5q13.1          | [52, 53]   |
| DFNB50    | 12q23           | [31]       |
| DFNB51    | 11p13-p12       | [54]       |
| DFNB53    | 6p21.3          | [55]       |
| DFNB55    | 4q12-q13.2      | [56]       |
| DFNB57    | 10q23.1-q26.11  | [31]       |
| DFNB58    | 2q14.1-q21.2    | [31]       |
| DFNB59    | 2q31.1-q31.3    | [57]       |
| DFNB60    | 5q22-q31        | [31]       |
| DFNB61    | 7q22.1          | [31]       |
| DFNB62    | 12p13.2-p11.23  | [58]       |
| DFNB63    | 11q13.3-q13.4   | [59, 60]   |
| DFNB65    | 20q13.2-q13.32  | [61]       |
| DFNB66    | 6p21.2-p22.3    | [62]       |
| DFNB67    | 6p21.1-p22.3    | [63]       |
| DFNB68    | 19p13.2         | [64]       |
| DFNB72    | 19p13.3         | [65]       |

## References

1. Guilford P, Ben Arab S, Blanchard S, Levilliers J, Weissenbach J, et al. (1994) A non-syndrome form of neurosensory, recessive deafness maps to the pericentromeric region of chromosome 13q. *Nat Genet* 6: 24-28.
2. Brown K, Janjua A, Karbani G, Parry G, Noble A, et al. (1996) Linkage studies of non-syndromic recessive deafness (NSRD) in a family originating from the Mirpur region of Pakistan maps DFNB1 centromeric to D13s175. *Hum Mol Genet* 5: 169-173.
3. Kelsell D, Dunlop J, Stevens H, Lench N, Liang J, et al. (1997) Connexin 26 mutations in hereditary non-syndromic sensorineural deafness. *Nature* 387: 80-83.
4. Guilford P, Ayadi H, Blanchard S, Chaib H, Le Paslier D, et al. (1994) A human gene responsible for neurosensory, non-syndromic recessive deafness is a candidate homologue of the mouse sh-1 gene. *Hum Mol Genet* 3: 989-993.
5. Liu X, Walsh J, Mburu P, Kendrick-Jones J, Cope M, et al. (1997) Mutations in the myosin VIIA gene cause non-syndromic recessive deafness. *Nat Genet* 16: 188-190.
6. Weil D, Kssel P, Blanchard S, Lvy G, Levi-Acobas F, et al. (1997) The autosomal recessive isolated deafness, DFNB2, and the Usher 1B syndrome are allelic defects of the myosin-VIIA gene. *Nat Genet* 16: 191-193.
7. Liang Y, Wang A, Probst F, Arhya I, Barber T, et al. (1998) Genetic mapping refines DFNB3 to 17p11.2, suggests multiple alleles of DFNB3, and supports homology to the mouse model shaker-2. *Am J Hum Genet* 62: 904-915.
8. Baldwin C, Weiss S, Farrer L, De Stefano A, Adair R, et al. (1995) Linkage of congenital, recessive deafness (DFNB4) to chromosome 7q31 and evidence for genetic heterogeneity in the Middle Eastern Druze population. *Hum Mol Genet* 4: 1637-1642.
9. Fukushima K, Ramesh A, Srisailapathy C, Ni L, Chen A, et al. (1995) Consanguineous nuclear families used to identify a new locus for recessive non-syndromic hearing loss on 14q. *Am J Hum Genet* 4: 1643-1648.
10. Petit C (1996) Genes responsible for human hereditary deafness: symphony of a thousand. *Nat Genet* 14: 385-391.
11. Fukushima K, Ramesh A, Srisailapathy C, Ni L, Wayne S, et al. (1995) An autosomal recessive nonsyndromic form of sensorineural hearing loss maps to 3p-DFNB6. *Genome Res* 5: 305-308.
12. Jain P, Fukushima K, Deshmukh D, Ramesh A, Thomas E, et al. (1995) A human recessive neurosensory nonsyndromic hearing impairment locus is potential homologue of murine deafness (dn) locus. *Hum Mol Genet* 4: 2391-2394.
13. Veske A, Oehlmann R, Younus F, Mohyuddin A, Mller-Myhsok B, et al. (1996) Autosomal recessive non-syndromic deafness locus (DFNB8) maps on chromosome 21q22 in a large consanguineous kindred from Pakistan. *Hum Mol Genet* 5: 165-168.
14. Chaïb H, Lina-Granade G, Guilford P, Plauchu H, Levilliers J, et al. (1994) A gene responsible for a dominant form of neurosensory non-syndromic deafness maps to the NSRD1 recessive deafness gene interval. *Hum Mol Genet* 3: 2219-2222.

15. Bonn -Tamir B, De Stefano A, Briggs C, Adair R, Franklyn B, et al. (1996) Linkage of congenital recessive deafness (gene DFNB10) to chromosome 21q22.3. *Am J Hum Genet* 58: 1254-1259.
16. Berry A, Scott H, Kudoh J, Talior I, Korostishevsky M, et al. (2000) Refined localization of autosomal recessive nonsyndromic deafness DFNB10 locus using 34 novel microsatellite markers, genomic structure, and exclusion of six known genes in the region. *Genomics* 68: 22-29.
17. Scott D, Carmi R, Elbedour K, Yosefsberg S, Stone E, et al. (1996) An autosomal recessive nonsyndromic-hearing-loss locus identified by DNA pooling using two inbred Bedouin kindreds. *Am J Hum Genet* 59: 385-391.
18. Mustapha M, Chardenoux S, Nieder A, Salem N, Weissenbach J, et al. (1998) A sensorineural progressive autosomal recessive form of isolated deafness, DFNB13, maps to chromosome 7q34-q36. *Eur J Hum Genet* 6: 245-250.
19. Mustapha M, Salem N, Weil D, el Zir E, Loiselet J, et al. (1998) Identification of a locus on chromosome 7q31, DFNB14, responsible for prelingual sensorineural non-syndromic deafness. *Eur J Hum Genet* 6: 548-551.
20. Chen A, Wayne S, Bell A, Ramesh A, Srisailapathy C, et al. (1997) New gene for autosomal recessive non-syndromic hearing loss maps to either chromosome 3q or 19p. *Am J Hum Genet* 7: 467-471.
21. Villamar M, del Castillo I, Valle N, Romero L, Moreno F (1999) Deafness locus DFNB16 is located on chromosome 15q13-q21 within a 5-cM interval flanked by markers D15S994 and D15S132. *Am J Hum Genet* 64: 1238-1241.
22. Verpy E, Masmoudi S, Zwaenepoel I, Leibovici M, Hutchin T, et al. (2001) Mutations in a new gene encoding a protein of the hair bundle cause non-syndromic deafness at the DFNB16 locus. *Nat Genet* 29: 345-349.
23. Greinwald JJ, Wayne S, Chen A, Scott D, Zbar R, et al. (1998) Localization of a novel gene for nonsyndromic hearing loss (DFNB17) to chromosome region 7q31. *Am J Med Genet* 78: 107-113.
24. Jain P, Lalwani A, Li X, Singleton T, Smith T, et al. (1998) A gene for recessive nonsyndromic sensorineural deafness (DFNB18) maps to the chromosomal region 11p14-p15.1 containing the Usher syndrome type 1C gene. *Genomics* 50: 290-292.
25. Green, et al (1998) Abstract 107. In: *The Molecular Biology of Hearing and Deafness Meeting*. Bethesda, Maryland.
26. Moynihan L, Houseman M, Newton V, Mueller R, Lench N (1999) DFNB20: a novel locus for autosomal recessive, non-syndromal sensorineural hearing loss maps to chromosome 11q25-qter. *Eur J Hum Genet* 7: 243-246.
27. Mustapha M, Weil D, Chardenoux S, Elias S, El-Zir E, et al. (1999) An alpha-tectorin gene defect causes a newly identified autosomal recessive form of sensorineural pre-lingual non-syndromic deafness, DFNB21. *Hum Mol Genet* 8: 409-412.
28. Zwaenepoel I, Mustapha M, Leibovici M, Verpy E, Goodyear R, et al. (2002) Otoancorin, an inner ear protein restricted to the interface between the apical surface of sensory epithelia and their overlying acellular gels, is defective in autosomal recessive deafness DFNB22. *Proc Natl Acad Sci U S A* 99: 6240-6245.

29. Ahmed Z, Riazuddin S, Ahmad J, Bernstein S, Guo Y, et al. (2003) PCDH15 is expressed in the neurosensory epithelium of the eye and ear and mutant alleles are responsible for both USH1F and DFNB23. *Hum Mol Genet* 12: 3215-3223.
30. Khan S, Ahmed Z, Shabbir M, Kitajiri S, Kalsoom S, et al. (2007) Mutations of the RDX gene cause nonsyndromic hearing loss at the DFNB24 locus. *Hum Mutat* 28: 417-423.
31. Hereditary Hearing Loss Homepage. URL <http://webh01.ua.ac.be/hhh/>.
32. Riazuddin S, Castelein C, Ahmed Z, Lalwani A, Mastroianni M, et al. (2000) Dominant modifier DFNM1 suppresses recessive deafness DFNB26. *Nat Genet* 26: 431-434.
33. Pulleyn L, Jackson A, Roberts E, Carridice A, Muxworthy C, et al. (2000) A new locus for autosomal recessive non-syndromal sensorineural hearing impairment (DFNB27) on chromosome 2q23-q31. *Eur J Hum Genet* 8: 991-993.
34. Shahin H, Walsh T, Sobe T, Abu Sa'ed J, Abu Rayan A, et al. (2006) Mutations in a novel isoform of TRIOBP that encodes a filamentous-actin binding protein are responsible for DFNB28 recessive nonsyndromic hearing loss. *Am J Hum Genet* 78: 144-152.
35. Wilcox E, Burton Q, Naz S, Riazuddin S, Smith T, et al. (2001) Mutations in the gene encoding tight junction claudin-14 cause autosomal recessive deafness DFNB29. *Cell* 104: 165-172.
36. Walsh T, Walsh V, Vreugde S, Hertzano R, Shahin H, et al. (2002) From flies' eyes to our ears: mutations in a human class III myosin cause progressive nonsyndromic hearing loss DFNB30. *Proc Natl Acad Sci U S A* 99: 7518-7523.
37. Mustapha M, Chouery E, Chardenoux S, Naboulsi M, Paronnaud J, et al. (2002) DFNB31, a recessive form of sensorineural hearing loss, maps to chromosome 9q32-34. *Eur J Hum Genet* 10: 210-212.
38. Masmoudi S, Tlili A, Majava M, Ghorbel A, Chardenoux S, et al. (2002) Mapping of a new autosomal recessive nonsyndromic hearing loss locus (DFNB32) to chromosome 1p13.3-22.1. *Eur J Hum Genet* 11: 185-188.
39. Belguith H, Masmoudi S, Medlej-Hashim M, Chouery E, Weil D, et al. (2009) Re-assigning the DFNB33 locus to chromosome 10p11.23-q21.1. *Eur J Hum Genet* 17: 122-124.
40. Ansar M, Din M, Arshad M, Sohail M, Faiyaz-Ul-Haque M, et al. (2003) A novel autosomal recessive non-syndromic deafness locus (DFNB35) maps to 14q24.1-14q24.3 in large consanguineous kindred from Pakistan. *Eur J Hum Genet* 11: 77-80.
41. Naz S, Griffith A, Riazuddin S, Hampton L, Battey JJ, et al. (2004) Mutations of ESPN cause autosomal recessive deafness and vestibular dysfunction. *J Med Genet* 41: 591-595.
42. Ahmed Z, Morell R, Riazuddin S, Gropman A, Shaukat S (2003) Localization of a novel autosomal recessive non-syndromic hearing impairment locus (DFNB38) to 6q26-q27 in a consanguineous kindred from Pakistan. *Am J Hum Genet* 72: 1315-1322.
43. Ansar M, Ramzan M, Pham T, Yan K, Jamal S, et al. (2003) Localization of a novel autosomal recessive non-syndromic hearing impairment locus (DFNB38) to 6q26-q27 in a consanguineous kindred from Pakistan. *Hum Hered* 55: 71-74.
44. Wajid M, Abbasi A, Ansar M, Pham T, Yan K, et al. (2003) DFNB39, a recessive form of sensorineural hearing impairment, maps to chromosome 7q11.22-q21.12. *Eur J Hum Genet* 11: 812-815.

45. Delmaghani S, Aghaie A, Compain-Nouaille S, Ataie A, Lemainque A, et al. (2003) DFNB40, a recessive form of sensorineural hearing loss, maps to chromosome 22q11.21-12.1. *Eur J Hum Genet* 11: 816-818.
46. Aslam M, Wajid M, Chahrour M, Ansar M, Haque S, et al. (2005) A novel autosomal recessive nonsyndromic hearing impairment locus (DFNB42) maps to chromosome 3q13.31-q22.3. *Am J Med Genet A* 133: 18-22.
47. Ansar M, Chahrour M, Amin Ud Din M, Arshad M, Haque S, et al. (2004) DFNB44, a novel autosomal recessive non-syndromic hearing impairment locus, maps to chromosome 7p14.1-q11.22. *Hum Hered* 57: 195-199.
48. Bhatti A, Lee K, McDonald M, Hassan M, Gutala R, et al. (2008) Mapping of a new autosomal recessive non-syndromic hearing impairment locus (DFNB45) to chromosome 1q43-q44. *Clin Genet* 73: 395-398.
49. Mir A, Ansar M, Chahrour M, Pham T, Wajid M, et al. (2005) Mapping of a novel autosomal recessive nonsyndromic deafness locus (DFNB46) to chromosome 18p11.32-p11.31. *Am J Med Genet A* 133: 23-26.
50. Hassan M, Santos R, Rafiq M, Chahrour M, Pham T, et al. (2006) A novel autosomal recessive non-syndromic hearing impairment locus (DFNB47) maps to chromosome 2p25.1-p24.3. *Hum Genet* 118: 605-610.
51. Ahmad J, Khan S, Khan S, Ramzan K, Riazuddin S, et al. (2005) DFNB44, a novel autosomal recessive non-syndromic hearing impairment locus, maps to chromosome 7p14.1-q11.22. *Hum Genet* 116: 407-412.
52. Ramzan K, Shaikh R, Ahmad J, Khan S, Riazuddin S, et al. (2005) A new locus for nonsyndromic deafness DFNB49 maps to chromosome 5q12.3-q14.1. *Hum Genet* 116: 17-22.
53. Riazuddin S, Ahmed Z, Fanning A, Lagziel A, Kitajiri S, et al. (2006) Tricellulin is a tight-junction protein necessary for hearing. *Am J Hum Genet* 79: 1040-1051.
54. Shaikh R, Ramzan K, Nazli S, Sattar S, Khan S, et al. (2005) A new locus for nonsyndromic deafness DFNB51 maps to chromosome 11p13-p12. *Am J Med Genet A* 138: 392-395.
55. Chen W, Kahrizi K, Meyer N, Riazalhosseini Y, Van Camp G, et al. (2005) Mutation of COL11A2 causes autosomal recessive non-syndromic hearing loss at the DFNB53 locus. *J Med Genet* 42: 61.
56. Irshad S, Santos R, Muhammad D, Lee K, McArthur N, et al. (2005) Localization of a novel autosomal recessive non-syndromic hearing impairment locus DFNB55 to chromosome 4q12-q13.2. *Clin Genet* 68: 262-267.
57. Delmaghani S, del Castillo F, Michel V, Leibovici M, Aghaie A, et al. (2006) Mutations in the gene encoding pejvakin, a newly identified protein of the afferent auditory pathway, cause DFNB59 auditory neuropathy. *Nat Genet* 38: 770-778.
58. Ali G, Santos R, John P, Wambangco M, Lee K, et al. (2006) The mapping of DFNB62, a new locus for autosomal recessive non-syndromic hearing impairment, to chromosome 12p13.2-p11.23. *Clin Genet* 69: 429-433.
59. Khan S, Riazuddin S, Tariq M, Anwar S, Shabbir M, et al. (2007) Autosomal recessive nonsyndromic deafness locus DFNB63 at chromosome 11q13.2-q13.3. *Hum Genet* 120: 789-793.

60. Tlili A, Masmoudi S, Dhouib H, Bouaziz S, Rebeh I, et al. (2007) Localization of a novel autosomal recessive non-syndromic hearing impairment locus DFNB63 to chromosome 11q13.3-q13.4. *Ann Hum Genet* 71: 271-275.
61. Tariq A, Santos R, Khan M, Lee K, Hassan M, et al. (2006) Localization of a novel autosomal recessive nonsyndromic hearing impairment locus DFNB65 to chromosome 20q13.2-q13.32. *J Mol Med* 84: 484-490.
62. Tlili A, Mnnikk M, Charfedine I, Lahmar I, Benzina Z, et al. (2005) A novel autosomal recessive non-syndromic deafness locus, DFNB66, maps to chromosome 6p21.2-22.3 in a large Tunisian consanguineous family. *Hum Hered* 60: 123-128.
63. Shabbir M, Ahmed Z, Khan S, Riazuddin S, Waryah A, et al. (2006) Mutations of human TMHS cause recessively inherited non-syndromic hearing loss. *J Med Genet* 43: 634-640.
64. Santos R, Hassan M, Sikandar S, Lee K, Ali G, et al. (2006) DFNB68, a novel autosomal recessive non-syndromic hearing impairment locus at chromosomal region 19p13.2. *Hum Genet* 120: 85-92.
65. Ain Q, Nazli S, Riazuddin S, Jaleel A, Riazuddin S, et al. (2007) The autosomal recessive nonsyndromic deafness locus DFNB72 is located on chromosome 19p13.3. *Hum Genet* 122: 445-450.
