# Supplementary material for: Finding New Genes for Non-Syndromic Hearing Loss through an In Silico Prioritization Study
Source: PubMed Central journal article supplement (PMC2946934; doi:10.1371/journal.pone.0012742), 2010-09-28
Supplement: pone.0012742.s003.pdf [file pone.0012742.s003.pdf]

**Table S3. NSHL X-linked, Y-linked and modifier loci**

| LocusName | Position | References |
|-----------|----------|------------|
| DFN1      | Xq22     | [1]        |
| DFN2      | Xq22     | [2]        |
| DFN3      | Xq21.1   | [3]        |
| DFN4      | Xp21.2   | [4]        |
| DFN6      | Xp22     | [5]        |
| DFNY1     | Y        | [6]        |
| DFNM1     | 1q24     | [7]        |

## References

1. Tranebjaerg L, Schwartz C, Eriksen H, Andreasson S, Ponjavic V, et al. (1995) A new X linked recessive deafness syndrome with blindness, dystonia, fractures, and mental deficiency is linked to Xq22. *J Med Genet* 32: 257-263.
2. Tyson J, Bellman S, Newton V, Simpson P, Malcolm S, et al. (1996) Mapping of DFN2 to Xq22. *Hum Mol Genet* 5: 2055-2060.
3. Bach I, Robinson D, Thomas N, Ropers H, Cremers F (1992) Physical fine mapping of genes underlying X-linked deafness and non fra (X)-X-linked mental retardation at Xq21. *Hum Genet* 89: 620-624.
4. Lalwani A, Brister J, Fex J, Grundfast K, Pikus A, et al. (1994) A new nonsyndromic X-linked sensorineural hearing impairment linked to Xp21.2. *Am J Hum Genet* 55: 685-694.
5. del Castillo I, Villamar M, Sarduy M, Romero L, Herraiz C, et al. (1996) A novel locus for non-syndromic sensorineural deafness (DFN6) maps to chromosome Xp22. *Hum Mol Genet* 5: 1383-1387.
6. Wang Q, Lu C, Li N, Rao S, Shi Y, et al. (2004) Y-linked inheritance of non-syndromic hearing impairment in a large Chinese family. *J Med Genet* 41(6): e80.
7. Riazuddin S, Castelein C, Ahmed Z, Lalwani A, Mastroianni M, et al. (2000) Dominant modifier DFNM1 suppresses recessive deafness DFNB26. *Nat Genet* 26: 431-434.
